# Supplementary material for: Measurement invariance, the lack thereof, and modeling change
Source: Springer Nature journal article supplement (doi:10.1007/s11136-017-1673-7), 2017-08-17
Supplement: MOESM1 [file 14222468]

**Example 1- Simulate language group data using parameters specified in Table 1**

<Project>

Title = "QoLR PRO Development Special Issue - Measurement Invariance";

Description = "Data Simulation - Two Group, 10 items, N = 200";

<Options>

Mode = Simulation;

RndSeed = 9009;

SlopeThreshold = Yes;

ReadPRMFile = "QoLR 2 Group Invariance 10 items-PRM.txt";

<Groups>

%Grp1%

File = "QoLR 2 Group Invariance 10 items-grp1.dat";

Varnames = v1-v10;

N = 200 ;

%Grp2%

File = "QoLR 2 Group Invariance 10 items-grp2.dat";

Varnames = v1-v10;

N = 200 ;

<Constraints>

**Example 1 – Fit model and score estimation assuming measurement invariance for all items**

<Project>

Title = "QoLR PRO Development Special Issue - Measurement Invariance";

Description = "EAP Scores NOT including DIF - Two Group, 10 items, N = 200";

<Options>

Mode = Calibration;

SlopeThreshold = Yes;

SaveSCO = Yes;

Score = EAP;

GOF = Extended;

M2 = Full;

<Groups>

%GRP1%

File = "QoLR 2 Group Invariance 10 items-grp1.dat";

Varnames = v1-v10, ID, GenTheta;

Select = v1-v10;

Ncats(v1-v10) = 2;

Model(v1-v10) = Graded(2);

%GRP2%

File = "QoLR 2 Group Invariance 10 items-grp2.dat";

Varnames = v1-v10, ID, GenTheta;

Select = v1-v10;

Ncats(v1-v10) = 2;

Model(v1-v10) = Graded(2);

<Constraints>

Equal GRP1,(v1-v10),Slope:

GRP2,(v1-v10),Slope;

Equal GRP1,(v1-v10),Intercept:

GRP2,(v1-v10),Intercept;

Free GRP2, Mean;

Free GRP2, Cov(1,1);

**Example 1– Fit model and score estimation allowing for measurement non-invariance in items 1 and 2**

<Project>

Title = "QoLR PRO Development Special Issue - Measurement Invariance";

Description = "EAP Scores including DIF - Two Group, 10 items, N = 200";

<Options>

Mode = Calibration;

SlopeThreshold = Yes;

SaveSCO = Yes;

Score = EAP;

GOF = Extended;

M2 = Full;

<Groups>

%GRP1%

File = "QoLR 2 Group Invariance 10 items-grp1.dat";

Varnames = v1-v10, ID, GenTheta;

Select = v1 - v10;

Ncats(v1-v10) = 2;

Model(v1-v10) = Graded(2);

%GRP2%

File = "QoLR 2 Group Invariance 10 items-grp2.dat";

Varnames = v1-v10, ID, GenTheta;

Select = v1 - v10;

Ncats(v1-v10) = 2;

Model(v1-v10) = Graded(2);

<Constraints>

Equal GRP1,(v1-v10),Slope:

GRP2,(v1-v10),Slope;

Equal GRP1,(v3-v10),Intercept:

GRP2,(v3-v10),Intercept;

Free GRP2, Mean;

Free GRP2, Cov(1,1);

**Example 2 – Simulate longitudinal data using parameters specified in Table 1.**

<PROJECT>

Title = "QoLR PRO Development Special Issue - Measurement Invariance";

Description = "Data Simulation - Longitudinal, Two Timepoints, Single Group, 10 items, N = 300";

<OPTIONS>

Mode = Simulation;

RndSeed = 1613;

ReadPRMFile = "QoLR 2 Long Invariance 10 items-PRM.txt";

<GROUPS>

%GRP1%

File = "QoLR 2 Long Invariance 10 items.dat ";

Varnames = t1_v1,t1_v2,t1_v3,t1_v4,t1_v5,t1_v6,t1_v7,t1_v8,t1_v9,t1_v10,

t2_v1,t2_v2,t2_v3,t2_v4,t2_v5,t2_v6,t2_v7,t2_v8,t2_v9,t2_v10;

N = 300;

Dimensions = 2;

<CONSTRAINTS>

**Example 2 – Fit model and scores estimation assuming invariance in items 1 and 2**

<Project>

Title = "QoLR PRO Development Special Issue - Measurement Invariance";

Description = "EAP Scores NOT Including DIF - Longitudinal, Two Timepoints, Single Group, 10 items, N = 300";

<Options>

Mode = Calibration;

SavePRM = Yes;

SaveSCO = Yes;

Score = EAP;

GOF = Extended;

M2 = Full;

<Groups>

%GRP1%

File = "QoLR 2 Long Invariance 10 items.dat ";

Varnames = t1_v1,t1_v2,t1_v3,t1_v4,t1_v5,t1_v6,t1_v7,t1_v8,t1_v9,t1_v10,

t2_v1,t2_v2,t2_v3,t2_v4,t2_v5,t2_v6,t2_v7,t2_v8,t2_v9,t2_v10,

ID,GenTheta1,GenTheta2;

Select = t1_v1,t1_v2,t1_v3,t1_v4,t1_v5,t1_v6,t1_v7,t1_v8,t1_v9,t1_v10,

t2_v1,t2_v2,t2_v3,t2_v4,t2_v5,t2_v6,t2_v7,t2_v8,t2_v9,t2_v10;

Ncats(t1_v1,t1_v2,t1_v3,t1_v4,t1_v5,t1_v6,t1_v7,t1_v8,t1_v9,t1_v10,

t2_v1,t2_v2,t2_v3,t2_v4,t2_v5,t2_v6,t2_v7,t2_v8,t2_v9,t2_v10) = 2;

Model(t1_v1,t1_v2,t1_v3,t1_v4,t1_v5,t1_v6,t1_v7,t1_v8,t1_v9,t1_v10,

t2_v1,t2_v2,t2_v3,t2_v4,t2_v5,t2_v6,t2_v7,t2_v8,t2_v9,t2_v10) = Graded(2);

Dimensions = 2;

<Constraints>

Fix (t1_v1,t1_v2,t1_v3,t1_v4,t1_v5,t1_v6,t1_v7,t1_v8,t1_v9,t1_v10), Slope(1);

Fix (t1_v1,t1_v2,t1_v3,t1_v4,t1_v5,t1_v6,t1_v7,t1_v8,t1_v9,t1_v10), Slope(2);

Fix (t2_v1,t2_v2,t2_v3,t2_v4,t2_v5,t2_v6,t2_v7,t2_v8,t2_v9,t2_v10), Slope(1);

Fix (t2_v1,t2_v2,t2_v3,t2_v4,t2_v5,t2_v6,t2_v7,t2_v8,t2_v9,t2_v10), Slope(2);

Equal GRP1,(t1_v1,t1_v2,t1_v3,t1_v4,t1_v5,t1_v6,t1_v7,t1_v8,t1_v9,t1_v10),Slope(1):

GRP1,(t2_v1,t2_v2,t2_v3,t2_v4,t2_v5,t2_v6,t2_v7,t2_v8,t2_v9,t2_v10),Slope(2);

Equal GRP1,(t1_v1,t1_v2,t1_v3,t1_v4,t1_v5,t1_v6,t1_v7,t1_v8,t1_v9,t1_v10),Intercept:

GRP1,(t2_v1,t2_v2,t2_v3,t2_v4,t2_v5,t2_v6,t2_v7,t2_v8,t2_v9,t2_v10),Intercept;

Free Mean(2);

Free COV(1,2);

**Example 2– Fit model and score estimation allowing for measurement non-invariance in items 1 and 2**

<Project>

Title = "QoLR PRO Development Special Issue - Measurement Invariance";

Description = "EAP Scores Including DIF - Longitudinal, Two Timepoints, Single Group, 10 items, N = 300";

<Options>

Mode = Calibration;

SavePRM = Yes;

SaveSCO = Yes;

Score = EAP;

GOF = Extended;

M2 = Full;

<Groups>

%GRP1%

File = "QoLR 2 Long Invariance 10 items.dat ";

Varnames = t1_v1,t1_v2,t1_v3,t1_v4,t1_v5,t1_v6,t1_v7,t1_v8,t1_v9,t1_v10,

t2_v1,t2_v2,t2_v3,t2_v4,t2_v5,t2_v6,t2_v7,t2_v8,t2_v9,t2_v10,

ID,GenTheta1,GenTheta2;

Select = t1_v1,t1_v2,t1_v3,t1_v4,t1_v5,t1_v6,t1_v7,t1_v8,t1_v9,t1_v10,

t2_v1,t2_v2,t2_v3,t2_v4,t2_v5,t2_v6,t2_v7,t2_v8,t2_v9,t2_v10;

Ncats(t1_v1,t1_v2,t1_v3,t1_v4,t1_v5,t1_v6,t1_v7,t1_v8,t1_v9,t1_v10,

t2_v1,t2_v2,t2_v3,t2_v4,t2_v5,t2_v6,t2_v7,t2_v8,t2_v9,t2_v10) = 2;

Model(t1_v1,t1_v2,t1_v3,t1_v4,t1_v5,t1_v6,t1_v7,t1_v8,t1_v9,t1_v10,

t2_v1,t2_v2,t2_v3,t2_v4,t2_v5,t2_v6,t2_v7,t2_v8,t2_v9,t2_v10) = Graded(2);

Dimensions = 2;

<Constraints>

Fix (t1_v1,t1_v2,t1_v3,t1_v4,t1_v5,t1_v6,t1_v7,t1_v8,t1_v9,t1_v10), Slope(1);

Fix (t1_v1,t1_v2,t1_v3,t1_v4,t1_v5,t1_v6,t1_v7,t1_v8,t1_v9,t1_v10), Slope(2);

Fix (t2_v1,t2_v2,t2_v3,t2_v4,t2_v5,t2_v6,t2_v7,t2_v8,t2_v9,t2_v10), Slope(1);

Fix (t2_v1,t2_v2,t2_v3,t2_v4,t2_v5,t2_v6,t2_v7,t2_v8,t2_v9,t2_v10), Slope(2);

Equal GRP1,(t1_v1,t1_v2,t1_v3,t1_v4,t1_v5,t1_v6,t1_v7,t1_v8,t1_v9,t1_v10),Slope(1):

GRP1,(t2_v1,t2_v2,t2_v3,t2_v4,t2_v5,t2_v6,t2_v7,t2_v8,t2_v9,t2_v10),Slope(2);

Equal GRP1,(t1_v3,t1_v4,t1_v5,t1_v6,t1_v7,t1_v8,t1_v9,t1_v10),Intercept:

GRP1,(t2_v3,t2_v4,t2_v5,t2_v6,t2_v7,t2_v8,t2_v9,t2_v10),Intercept;

Free Mean(2);

Free COV(1,2);
